# Supplementary material
Source: HighWire-hosted journal article supplement (https://bmjopen.bmj.com/content/12/11/e065804)
Supplement: inline-supplementary-material-2 [file inline-supplementary-material-2.pdf]

Supplementary tables

Table S1: Reasons for not wanting to get vaccinated after experimental manipulation\*

| Reason                                  | Overall sample (N=306) |      | Only White ethnic background (N=118) |      | Model 3: Black, Asian, mixed or other ethnic background (N=188) |      |
|-----------------------------------------|------------------------|------|--------------------------------------|------|-----------------------------------------------------------------|------|
|                                         | N                      | (%)  | N                                    | (%)  | N                                                               | (%)  |
| Fear of side effect                     | 201                    | 65.9 | 83                                   | 70.9 | 118                                                             | 62.8 |
| Vaccine does not offer protection       | 115                    | 37.7 | 47                                   | 40.2 | 68                                                              | 36.2 |
| Critical reports in media               | 69                     | 22.6 | 25                                   | 21.4 | 44                                                              | 23.4 |
| General objections against vaccination  | 63                     | 20.7 | 28                                   | 23.9 | 35                                                              | 18.6 |
| Fear of needles                         | 44                     | 14.4 | 20                                   | 17.1 | 24                                                              | 12.8 |
| Other reasons                           | 37                     | 12.1 | 16                                   | 13.7 | 21                                                              | 11.2 |
| Disease is harmless                     | 30                     | 9.8  | 8                                    | 6.8  | 22                                                              | 11.7 |
| Discouraged by family/friends' opinion  | 26                     | 8.5  | 9                                    | 7.7  | 17                                                              | 9.0  |
| Discouraged by physician's opinion      | 17                     | 5.6  | 9                                    | 7.7  | 8                                                               | 4.3  |
| Difficulties getting to the appointment | 14                     | 4.6  | 6                                    | 5.1  | 8                                                               | 4.3  |
| Too much effort                         | 8                      | 2.6  | 2                                    | 1.7  | 6                                                               | 3.2  |

\*only answered by study participants that stated low vaccination intentions [1-4] after the experimental manipulation

Table S2: Descriptive statistics across experimental conditions

|                      | Control (N=167) |         | Society (N=176) |         | Family and friends (N=169) |         | Total (N=512) |         |
|----------------------|-----------------|---------|-----------------|---------|----------------------------|---------|---------------|---------|
|                      | N               | (%)     | N               | (%)     | N                          | (%)     | N             | (%)     |
| Vaccination status   |                 |         |                 |         |                            |         |               |         |
| Have been invited    | 101             | (60.5%) | 94              | (53.4%) | 107                        | (63.3%) | 302           | (59.0%) |
| Not been invited yet | 66              | (39.5%) | 82              | (46.6%) | 62                         | (36.7%) | 210           | (41.0%) |
| Age                  |                 |         |                 |         |                            |         |               |         |
| 18-24 years old      | 54              | (32.3%) | 52              | (29.5%) | 43                         | (25.4%) | 149           | (29.1%) |
| 25-34 years old      | 74              | (44.3%) | 90              | (51.1%) | 72                         | (42.6%) | 236           | (46.1%) |
| 35-44 years old      | 14              | (8.4%)  | 14              | (8.0%)  | 35                         | (20.7%) | 63            | (12.3%) |
| 45+ years old        | 25              | (15.0%) | 20              | (11.3%) | 19                         | (11.2%) | 64            | (12.5%) |
| Gender               |                 |         |                 |         |                            |         |               |         |
| Male                 | 74              | (44.3%) | 81              | (46.0%) | 67                         | (39.6%) | 222           | (43.4%) |
| Female               | 93              | (55.7%) | 93              | (52.8%) | 99                         | (58.6%) | 285           | (55.7%) |
| Non-binary           | 0               | (0.0%)  | 2               | (1.1%)  | 3                          | (1.8%)  | 5             | (1.0%)  |
| Ethnicity            |                 |         |                 |         |                            |         |               |         |
| White                | 72              | (43.1%) | 78              | (44.3%) | 57                         | (33.7%) | 207           | (40.4%) |
| Mixed                | 16              | (9.6%)  | 30              | (17.0%) | 23                         | (13.6%) | 69            | (13.5%) |
| Asian                | 30              | (18.0%) | 34              | (19.3%) | 36                         | (21.3%) | 100           | (19.5%) |
| Black                | 45              | (26.9%) | 32              | (18.2%) | 46                         | (27.2%) | 123           | (24.0%) |
| Arab or other        | 4               | (2.4%)  | 2               | (1.1%)  | 7                          | (4.1%)  | 13            | (2.5%)  |
| A-levels             |                 |         |                 |         |                            |         |               |         |
| No                   | 29              | (17.4%) | 31              | (17.6%) | 46                         | (27.2%) | 106           | (20.7%) |
| Yes                  | 138             | (82.6%) | 145             | (82.4%) | 123                        | (72.8%) | 406           | (79.3%) |
| Paid employment      |                 |         |                 |         |                            |         |               |         |
| No                   | 49              | (29.3%) | 47              | (26.7%) | 58                         | (34.3%) | 154           | (30.1%) |
| Yes                  | 118             | (70.7%) | 129             | (73.3%) | 111                        | (65.7%) | 358           | (69.9%) |
| Living condition     |                 |         |                 |         |                            |         |               |         |
| Alone                | 89              | (53.3%) | 91              | (51.7%) | 96                         | (56.8%) | 276           | (53.9%) |
| With someone         | 78              | (46.7%) | 85              | (48.3%) | 73                         | (43.2%) | 236           | (46.1%) |

Table S3: Binary logistic regression on active interest to read more about vaccination

|                    | (%)  | Model 1: Overall sample |               |       |                | (%)  | Model 2: Only White ethnic background |               |       |                | (%)  | Model 3: Black, Asian, mixed or other ethnic background |                |       |                |
|--------------------|------|-------------------------|---------------|-------|----------------|------|---------------------------------------|---------------|-------|----------------|------|---------------------------------------------------------|----------------|-------|----------------|
|                    |      | OR                      | 95% CI        | aOR   | 95% CI         |      | OR                                    | 95% CI        | aOR   | 95% CI         |      | OR                                                      | 95% CI         | aOR   | 95% CI         |
| Condition          |      |                         |               |       |                |      |                                       |               |       |                |      |                                                         |                |       |                |
| Control            | 34.7 | Ref.                    |               | Ref.  |                | 33.3 | Ref.                                  |               | Ref.  |                | 35.8 | Ref.                                                    |                | Ref.  |                |
| Society            | 44.9 | 1.531                   | 0.990 - 2.366 | 1.472 | 0.940 - 2.307  | 42.3 | 1.446                                 | 0.726 - 2.882 | 1.587 | 0.891 - 2.827  | 46.9 | 1.587                                                   | 0.891 - 2.827  | 1.570 | 0.870 - 2.833  |
| Family and friends | 42.6 | 1.395                   | 0.898 - 2.168 | 1.484 | 0.933 - 2.360  | 47.4 | 1.896                                 | 0.876 - 4.103 | 1.205 | 0.685 - 2.119  | 40.1 | 1.205                                                   | 0.685 - 2.119  | 1.270 | 0.704 - 2.290  |
| Vaccination status |      |                         |               |       |                |      |                                       |               |       |                |      |                                                         |                |       |                |
| Invited            | 38.1 | Ref.                    |               | Ref.  |                | 38.6 | Ref.                                  |               | Ref.  |                | 37.7 | Ref.                                                    |                | Ref.  |                |
| Not invited        | 44.8 | 1.318                   | 0.921 - 1.884 | 1.581 | 1.067 - 2.342* | 42.8 | 1.238                                 | 0.701 - 2.185 | 1.456 | 0.770 - 2.754  | 45.4 | 1.372                                                   | 0.865 - 2.176  | 1.621 | 0.979 - 2.685  |
| Age                |      |                         |               |       |                |      |                                       |               |       |                |      |                                                         |                |       |                |
| 18-24 years old    | 36.9 | Ref.                    |               | Ref.  |                | 33.3 | Ref.                                  |               | Ref.  |                | 38.6 | Ref.                                                    |                | Ref.  |                |
| 25-34 years old    | 39.4 | 1.112                   | 0.728 - 1.697 | 1.182 | 0.735 - 1.901  | 40.2 | 1.343                                 | 0.664 - 2.717 | 1.597 | 0.734 - 3.474  | 38.7 | 1.002                                                   | 0.581 - 1.727  | 0.901 | 0.489 - 1.662  |
| 35-44 years old    | 50.8 | 1.764                   | 0.973 - 3.200 | 1.722 | 0.889 - 3.333  | 53.8 | 2.333                                 | 0.672 - 8.101 | 2.726 | 0.707 - 10.503 | 50.0 | 1.590                                                   | 0.802 - 3.150  | 1.501 | 0.693 - 3.252  |
| 45+ years old      | 45.3 | 1.416                   | 0.782 - 2.565 | 1.915 | 0.986 - 3.718  | 48.3 | 1.867                                 | 0.726 - 4.796 | 2.415 | 0.839 - 6.951  | 42.9 | 1.192                                                   | 0.546 - 2.601  | 1.351 | 0.559 - 3.266  |
| Gender             |      |                         |               |       |                |      |                                       |               |       |                |      |                                                         |                |       |                |
| Male               | 42.3 | Ref.                    |               | Ref.  |                | 39.8 | Ref.                                  |               | Ref.  |                | 44.5 | Ref.                                                    |                | Ref.  |                |
| Female             | 39.6 | 0.895                   | 0.626 - 1.278 | 0.898 | 0.617 - 1.308  | 41.6 | 1.076                                 | 0.616 - 1.882 | 1.113 | 0.614 - 2.019  | 38.6 | 0.782                                                   | 0.490 - 1.249  | 0.809 | 0.494 - 1.325  |
| Non-binary         | 40.0 | 0.908                   | 0.149 - 5.541 | 0.657 | 0.102 - 4.213  | 33.3 | 0.756                                 | 0.066 - 8.611 | 0.547 | 0.045 - 6.582  | 50.0 | 1.245                                                   | 0.076 - 20.382 | 1.112 | 0.065 - 19.070 |
| Ethnicity          |      |                         |               |       |                |      |                                       |               |       |                |      |                                                         |                |       |                |
| White              | 40.6 | Ref.                    |               | Ref.  |                |      |                                       |               |       |                |      |                                                         |                |       |                |
| Mixed              | 40.6 | 1.000                   | 0.574 - 1.742 | 0.908 | 0.510 - 1.616  |      |                                       |               |       |                |      |                                                         |                |       |                |
| Asian              | 52.0 | 1.586                   | 0.981 - 2.565 | 1.468 | 0.884 - 2.440  |      |                                       |               |       |                |      |                                                         |                |       |                |
| Black              | 34.9 | 0.787                   | 0.495 - 1.250 | 0.742 | 0.456 - 1.209  |      |                                       |               |       |                |      |                                                         |                |       |                |
| Arab or other      | 15.4 | 0.266                   | 0.058 - 1.232 | 0.280 | 0.059 - 1.323  |      |                                       |               |       |                |      |                                                         |                |       |                |
| A-levels           |      |                         |               |       |                |      |                                       |               |       |                |      |                                                         |                |       |                |
| No                 | 33.0 | Ref.                    |               | Ref.  |                | 32.7 | Ref.                                  |               | Ref.  |                | 33.3 | Ref.                                                    |                | Ref.  |                |
| Yes                | 42.9 | 1.521                   | 0.970 - 2.386 | 1.692 | 1.042 - 2.746* | 43.2 | 1.568                                 | 0.809 - 3.035 | 2.253 | 1.072 - 4.735* | 42.6 | 1.486                                                   | 0.801 - 2.759  | 1.611 | 0.827 - 3.140  |
| Living condition   |      |                         |               |       |                |      |                                       |               |       |                |      |                                                         |                |       |                |
| Alone              | 39.1 | Ref.                    |               | Ref.  |                | 41.1 | Ref.                                  |               | Ref.  |                | 38.1 | Ref.                                                    |                | Ref.  |                |
| With somebody      | 42.8 | 1.164                   | 0.817 - 1.657 | 0.973 | 0.652 - 1.452  | 40.2 | 0.964                                 | 0.553 - 1.683 | 0.873 | 0.476 - 1.603  | 45.2 | 1.337                                                   | 0.841 - 2.125  | 1.196 | 0.700 - 2.041  |
| Paid employment    |      |                         |               |       |                |      |                                       |               |       |                |      |                                                         |                |       |                |
| No                 | 38.3 | Ref.                    |               | Ref.  |                | 49.1 | Ref.                                  |               | Ref.  |                | 32.0 | Ref.                                                    |                | Ref.  |                |
| Yes                | 41.9 | 1.161                   | 0.789 - 1.710 | 1.107 | 0.727 - 1.686  | 37.3 | 0.617                                 | 0.333 - 1.142 | 0.606 | 0.310 - 1.183  | 45.5 | 1.756                                                   | 1.058 - 2.914* | 1.627 | 0.947 - 2.795  |
| N                  |      | 512                     |               | 512   |                |      | 207                                   |               | 207   |                |      | 305                                                     |                | 305   |                |

\*  $p<0.05$ ; \*\*  $p<0.01$

Table S4: Ordered logistic regression on perceived importance of vaccination [1;5]

|                    | Model 1: Overall sample |                 |       |                 | Model 2: Only White ethnic background |                 |       |                 | Model 3: Black, Asian, mixed or other ethnic background |                 |       |                 |
|--------------------|-------------------------|-----------------|-------|-----------------|---------------------------------------|-----------------|-------|-----------------|---------------------------------------------------------|-----------------|-------|-----------------|
|                    | OR                      | 95% CI          | aOR   | 95% CI          | OR                                    | 95% CI          | aOR   | 95% CI          | OR                                                      | 95% CI          | aOR   | 95% CI          |
| Condition          | Ref.                    |                 | Ref.  |                 | Ref.                                  |                 | Ref.  |                 | Ref.                                                    |                 | Ref.  |                 |
| Control            | 0.948                   | 0.649 - 1.386   | 0.897 | 0.608 - 1.325   | 1.493                                 | 0.836 - 2.668   | 1.458 | 0.794 - 2.677   | 0.647                                                   | 0.391 - 1.072   | 0.627 | 0.376 - 1.047   |
| Society            | 0.931                   | 0.639 - 1.357   | 1.042 | 0.706 - 1.539   | 1.271                                 | 0.692 - 2.334   | 1.833 | 0.961 - 3.496   | 0.751                                                   | 0.462 - 1.222   | 0.829 | 0.502 - 1.369   |
| Family and friends |                         |                 |       |                 |                                       |                 |       |                 |                                                         |                 |       |                 |
| Vaccination status |                         |                 |       |                 |                                       |                 |       |                 |                                                         |                 |       |                 |
| Invited            | Ref.                    |                 | Ref.  |                 | Ref.                                  |                 | Ref.  |                 | Ref.                                                    |                 | Ref.  |                 |
| Not invited        | 1.317                   | 0.964 - 1.799   | 1.200 | 0.859 - 1.677   | 0.919                                 | 0.562 - 1.503   | 0.563 | 0.321 - 0.990*  | 1.728                                                   | 1.149 - 2.599** | 1.774 | 1.151 - 2.733** |
| Age                |                         |                 |       |                 |                                       |                 |       |                 |                                                         |                 |       |                 |
| 18-24              | Ref.                    |                 | Ref.  |                 | Ref.                                  |                 | Ref.  |                 | Ref.                                                    |                 | Ref.  |                 |
| years old          |                         |                 |       |                 |                                       |                 |       |                 |                                                         |                 |       |                 |
| 25-34              | 0.851                   | 0.592 - 1.224   | 0.813 | 0.547 - 1.208   | 0.953                                 | 0.527 - 1.724   | 0.754 | 0.397 - 1.432   | 0.703                                                   | 0.439 - 1.126   | 0.690 | 0.411 - 1.159   |
| years old          |                         |                 |       |                 |                                       |                 |       |                 |                                                         |                 |       |                 |
| 35-44              | 0.754                   | 0.451 - 1.260   | 0.689 | 0.393 - 1.208   | 0.495                                 | 0.180 - 1.362   | 0.364 | 0.119 - 1.112   | 0.905                                                   | 0.491 - 1.669   | 0.905 | 0.463 - 1.769   |
| years old          |                         |                 |       |                 |                                       |                 |       |                 |                                                         |                 |       |                 |
| 45+ years old      | 0.401                   | 0.238 - 0.675** | 0.428 | 0.240 - 0.761** | 0.321                                 | 0.143 - 0.719** | 0.265 | 0.105 - 0.665** | 0.478                                                   | 0.237 - 0.965*  | 0.501 | 0.230 - 1.094   |
| Gender             |                         |                 |       |                 |                                       |                 |       |                 |                                                         |                 |       |                 |
| Male               | Ref.                    |                 | Ref.  |                 | Ref.                                  |                 | Ref.  |                 | Ref.                                                    |                 | Ref.  |                 |
| Female             | 0.557                   | 0.405 - 0.765** | 0.537 | 0.387 - 0.745** | 0.411                                 | 0.249 - 0.680** | 0.375 | 0.223 - 0.631** | 0.715                                                   | 0.472 - 1.085   | 0.707 | 0.459 - 1.090   |
| Non-binary         | 0.552                   | 0.130 - 2.341   | 0.509 | 0.118 - 2.205   | 0.857                                 | 0.154 - 4.754   | 1.124 | 0.182 - 6.955   | 0.163                                                   | 0.014 - 1.941   | 0.153 | 0.012 - 1.891   |
| Ethnicity          |                         |                 |       |                 |                                       |                 |       |                 |                                                         |                 |       |                 |
| White              | Ref.                    |                 | Ref.  |                 |                                       |                 |       |                 |                                                         |                 |       |                 |
| Mixed              | 0.701                   | 0.433 - 1.137   | 0.684 | 0.416 - 1.125   |                                       |                 |       |                 |                                                         |                 |       |                 |
| Asian              | 1.132                   | 0.740 - 1.731   | 1.100 | 0.707 - 1.710   |                                       |                 |       |                 |                                                         |                 |       |                 |
| Black              | 0.718                   | 0.482 - 1.071   | 0.633 | 0.417 - 0.960*  |                                       |                 |       |                 |                                                         |                 |       |                 |
| Arab or other      | 0.693                   | 0.259 - 1.854   | 0.707 | 0.253 - 1.975   |                                       |                 |       |                 |                                                         |                 |       |                 |
| A-levels           |                         |                 |       |                 |                                       |                 |       |                 |                                                         |                 |       |                 |
| No                 | Ref.                    |                 | Ref.  |                 | Ref.                                  |                 | Ref.  |                 | Ref.                                                    |                 | Ref.  |                 |
| Yes                | 1.741                   | 1.188 - 2.549** | 1.793 | 1.190 - 2.701** | 2.221                                 | 1.277 - 3.865** | 2.301 | 1.260 - 4.204** | 1.435                                                   | 0.840 - 2.453   | 1.466 | 0.827 - 2.599   |
| Living condition   |                         |                 |       |                 |                                       |                 |       |                 |                                                         |                 |       |                 |
| Alone              | Ref.                    |                 | Ref.  |                 | Ref.                                  |                 | Ref.  |                 | Ref.                                                    |                 | Ref.  |                 |
| With somebody      | 1.036                   | 0.758 - 1.416   | 1.088 | 0.770 - 1.536   | 0.908                                 | 0.558 - 1.478   | 0.811 | 0.483 - 1.360   | 1.117                                                   | 0.742 - 1.683   | 1.415 | 0.883 - 2.266   |
| Paid employment    |                         |                 |       |                 |                                       |                 |       |                 |                                                         |                 |       |                 |
| No                 | Ref.                    |                 | Ref.  |                 | Ref.                                  |                 | Ref.  |                 | Ref.                                                    |                 | Ref.  |                 |
| Yes                | 1.263                   | 0.906 - 1.761   | 1.120 | 0.788 - 1.590   | 1.545                                 | 0.910 - 2.625   | 1.252 | 0.714 - 2.196   | 1.093                                                   | 0.711 - 1.679   | 1.076 | 0.680 - 1.702   |
| N                  | 512                     |                 | 512   |                 | 207                                   |                 | 207   |                 | 305                                                     |                 | 305   |                 |

\*  $p<0.05$ ; \*\*  $p<0.01$

Table S5: Ordered logistic regression on expected uptake of vaccination [1;5]

|                    | Model 1: Overall sample |                 |       |                | Model 2: Only White ethnic background |                 |       |                | Model 3: Black, Asian, mixed or other ethnic background |               |       |               |
|--------------------|-------------------------|-----------------|-------|----------------|---------------------------------------|-----------------|-------|----------------|---------------------------------------------------------|---------------|-------|---------------|
|                    | OR                      | 95% CI          | aOR   | 95% CI         | OR                                    | 95% CI          | aOR   | 95% CI         | OR                                                      | 95% CI        | aOR   | 95% CI        |
| Condition          | Ref.                    |                 | Ref.  |                | Ref.                                  |                 | Ref.  |                | Ref.                                                    |               | Ref.  |               |
| Control            | 1.036                   | 0.696 - 1.540   | 1.048 | 0.700 - 1.571  | 1.260                                 | 0.694 - 2.288   | 1.443 | 0.779 - 2.674  | 0.856                                                   | 0.501 - 1.461 | 0.863 | 0.504 - 1.480 |
| Society            | 0.864                   | 0.585 - 1.276   | 0.885 | 0.592 - 1.324  | 0.852                                 | 0.443 - 1.636   | 1.000 | 0.508 - 1.970  | 0.874                                                   | 0.535 - 1.429 | 0.823 | 0.496 - 1.365 |
| Family and friends |                         |                 |       |                |                                       |                 |       |                |                                                         |               |       |               |
| Vaccination status |                         |                 |       |                |                                       |                 |       |                |                                                         |               |       |               |
| Invited            | Ref.                    |                 | Ref.  |                | Ref.                                  |                 | Ref.  |                | Ref.                                                    |               | Ref.  |               |
| Not invited        | 0.598                   | 0.431 - 0.830** | 0.640 | 0.451 - 0.908* | 0.491                                 | 0.290 - 0.831** | 0.513 | 0.290 - 0.909* | 0.675                                                   | 0.443 - 1.029 | 0.720 | 0.459 - 1.129 |
| Age                |                         |                 |       |                |                                       |                 |       |                |                                                         |               |       |               |
| 18-24              | Ref.                    |                 | Ref.  |                | Ref.                                  |                 | Ref.  |                | Ref.                                                    |               | Ref.  |               |
| years old          |                         |                 |       |                |                                       |                 |       |                |                                                         |               |       |               |
| 25-34              | 1.118                   | 0.765 - 1.635   | 1.017 | 0.666 - 1.553  | 1.375                                 | 0.734 - 2.574   | 1.106 | 0.562 - 2.179  | 0.915                                                   | 0.561 - 1.493 | 0.988 | 0.573 - 1.702 |
| years old          |                         |                 |       |                |                                       |                 |       |                |                                                         |               |       |               |
| 35-44              | 1.405                   | 0.818 - 2.415   | 1.324 | 0.737 - 2.380  | 1.283                                 | 0.399 - 4.120   | 1.431 | 0.444 - 4.608  | 1.442                                                   | 0.778 - 2.673 | 1.486 | 0.748 - 2.954 |
| years old          |                         |                 |       |                |                                       |                 |       |                |                                                         |               |       |               |
| 45+ years old      | 1.472                   | 0.849 - 2.553   | 1.332 | 0.727 - 2.441  | 1.479                                 | 0.622 - 3.517   | 1.197 | 0.464 - 3.088  | 1.463                                                   | 0.708 - 3.020 | 1.557 | 0.694 - 3.493 |
| Gender             |                         |                 |       |                |                                       |                 |       |                |                                                         |               |       |               |
| Male               | Ref.                    |                 | Ref.  |                | Ref.                                  |                 | Ref.  |                | Ref.                                                    |               | Ref.  |               |
| Female             | 0.839                   | 0.606 - 1.162   | 0.802 | 0.573 - 1.123  | 0.840                                 | 0.503 - 1.402   | 0.838 | 0.495 - 1.418  | 0.875                                                   | 0.570 - 1.345 | 0.830 | 0.533 - 1.292 |
| Non-binary         | 0.256                   | 0.056 - 1.171   | 0.289 | 0.060 - 1.401  | 0.170                                 | 0.021 - 1.342   | 0.231 | 0.029 - 1.867  | 0.406                                                   | 0.048 - 3.450 | 0.469 | 0.050 - 4.374 |
| Ethnicity          |                         |                 |       |                |                                       |                 |       |                |                                                         |               |       |               |
| White              | Ref.                    |                 | Ref.  |                |                                       |                 |       |                |                                                         |               |       |               |
| Mixed              | 0.839                   | 0.507 - 1.390   | 0.842 | 0.502 - 1.412  |                                       |                 |       |                |                                                         |               |       |               |
| Asian              | 1.067                   | 0.686 - 1.659   | 1.035 | 0.649 - 1.650  |                                       |                 |       |                |                                                         |               |       |               |
| Black              | 0.653                   | 0.432 - 0.989*  | 0.653 | 0.425 - 1.005  |                                       |                 |       |                |                                                         |               |       |               |
| Arab or other      | 0.838                   | 0.311 - 2.258   | 0.896 | 0.324 - 2.480  |                                       |                 |       |                |                                                         |               |       |               |
| A-levels           |                         |                 |       |                |                                       |                 |       |                |                                                         |               |       |               |
| No                 | Ref.                    |                 | Ref.  |                | Ref.                                  |                 | Ref.  |                | Ref.                                                    |               | Ref.  |               |
| Yes                | 1.312                   | 0.873 - 1.973   | 1.272 | 0.827 - 1.958  | 1.408                                 | 0.771 - 2.571   | 1.249 | 0.661 - 2.362  | 1.306                                                   | 0.744 - 2.292 | 1.363 | 0.741 - 2.505 |
| Living condition   |                         |                 |       |                |                                       |                 |       |                |                                                         |               |       |               |
| Alone              | Ref.                    |                 | Ref.  |                | Ref.                                  |                 | Ref.  |                | Ref.                                                    |               | Ref.  |               |
| With somebody      | 0.995                   | 0.722 - 1.370   | 0.828 | 0.581 - 1.179  | 1.019                                 | 0.612 - 1.696   | 0.858 | 0.501 - 1.469  | 0.942                                                   | 0.620 - 1.432 | 0.852 | 0.533 - 1.362 |
| Employment         |                         |                 |       |                |                                       |                 |       |                |                                                         |               |       |               |
| Paid employment    |                         |                 |       |                |                                       |                 |       |                |                                                         |               |       |               |
| No                 | Ref.                    |                 | Ref.  |                | Ref.                                  |                 | Ref.  |                | Ref.                                                    |               | Ref.  |               |
| Yes                | 1.158                   | 0.815 - 1.644   | 1.102 | 0.761 - 1.596  | 1.686                                 | 0.950 - 2.990   | 1.555 | 0.859 - 2.812  | 0.914                                                   | 0.585 - 1.427 | 0.876 | 0.545 - 1.408 |
| N                  | 512                     |                 | 512   |                | 207                                   |                 | 207   |                | 305                                                     |               | 305   |               |

\* p<0.05; \*\* p<0.01

Table S6. Adjusted logistic regression with interaction terms for condition and ethnicity on intentions, expectations and perceived social importance and active interest (N=512)

|                                      | Model 1: Intentions [1;8] |                 | Model 2: Expectations [1;5] |                 | Model 3: Social importance [1;5] |                 | Model 4: Active interest [0;1] |                |
|--------------------------------------|---------------------------|-----------------|-----------------------------|-----------------|----------------------------------|-----------------|--------------------------------|----------------|
|                                      | aOR                       | 95% CI          | aOR                         | 95% CI          | aOR                              | 95% CI          | aOR                            | 95% CI         |
| Condition and ethnicity              |                           |                 |                             |                 |                                  |                 |                                |                |
| Control – White                      | Ref.                      |                 | Ref.                        |                 | Ref.                             |                 | Ref.                           |                |
| Control – Ethnic minorities          | 1.304                     | 0.747 - 2.277   | 1.019                       | 0.570 - 1.824   | 1.264                            | 0.721 - 2.215   | 1.041                          | 0.536 - 2.020  |
| Society – White                      | 1.984                     | 1.090 - 3.614*  | 1.411                       | 0.776 - 2.567   | 1.529                            | 0.826 - 2.829   | 1.440                          | 0.730 - 2.839  |
| Society – Ethnic minorities          | 1.301                     | 0.748 - 2.265   | 0.873                       | 0.485 - 1.574   | 0.842                            | 0.480 - 1.476   | 1.661                          | 0.870 - 3.172  |
| Family and friends - White           | 1.681                     | 0.886 - 3.189   | 0.964                       | 0.501 - 1.857   | 1.568                            | 0.825 - 2.981   | 1.931                          | 0.921 - 4.047  |
| Family and friends – Ethnic minority | 1.419                     | 0.818 - 2.462   | 0.836                       | 0.476 - 1.465   | 1.026                            | 0.589 - 1.787   | 1.287                          | 0.673 - 2.460  |
| Vaccination status                   |                           |                 |                             |                 |                                  |                 |                                |                |
| Invited                              | Ref.                      |                 | Ref.                        |                 | Ref.                             |                 | Ref.                           |                |
| Not invited                          | 1.135                     | 0.819 - 1.574   | 0.625                       | 0.440 - 0.887** | 1.164                            | 0.833 - 1.627   | 1.515                          | 1.026 - 2.237* |
| Age                                  |                           |                 |                             |                 |                                  |                 |                                |                |
| 18-24 years old                      | Ref.                      |                 | Ref.                        |                 | Ref.                             |                 | Ref.                           |                |
| 25-34 years old                      | 0.951                     | 0.647 - 1.397   | 1.025                       | 0.674 - 1.559   | 0.804                            | 0.543 - 1.191   | 1.152                          | 0.721 - 1.840  |
| 35-44 years old                      | 0.844                     | 0.490 - 1.454   | 1.404                       | 0.784 - 2.514   | 0.749                            | 0.431 - 1.302   | 1.918                          | 0.999 - 3.682  |
| 45+ years old                        | 0.293                     | 0.164 - 0.523** | 1.346                       | 0.737 - 2.460   | 0.428                            | 0.241 - 0.761** | 1.824                          | 0.943 - 3.526  |
| Gender                               |                           |                 |                             |                 |                                  |                 |                                |                |
| Male                                 | Ref.                      |                 | Ref.                        |                 | Ref.                             |                 | Ref.                           |                |
| Female                               | 0.677                     | 0.491 - 0.933*  | 0.829                       | 0.593 - 1.158   | 0.546                            | 0.394 - 0.757** | 0.908                          | 0.626 - 1.317  |
| Non-binary                           | 0.360                     | 0.082 - 1.577   | 0.281                       | 0.059 - 1.340   | 0.457                            | 0.107 - 1.951   | 0.715                          | 0.112 - 4.552  |
| A-levels                             |                           |                 |                             |                 |                                  |                 |                                |                |
| No                                   | Ref.                      |                 | Ref.                        |                 | Ref.                             |                 | Ref.                           |                |
| Yes                                  | 1.629                     | 1.079 - 2.458*  | 1.264                       | 0.820 - 1.948   | 1.822                            | 1.210 - 2.745** | 1.783                          | 1.097 - 2.899* |
| Living condition                     |                           |                 |                             |                 |                                  |                 |                                |                |
| Alone                                | Ref.                      |                 | Ref.                        |                 | Ref.                             |                 | Ref.                           |                |
| With somebody                        | 1.263                     | 0.902 - 1.768   | 0.856                       | 0.602 - 1.216   | 1.127                            | 0.800 - 1.588   | 1.012                          | 0.682 - 1.503  |
| Paid employment                      |                           |                 |                             |                 |                                  |                 |                                |                |
| No                                   | Ref.                      |                 | Ref.                        |                 | Ref.                             |                 | Ref.                           |                |
| Yes                                  | 1.145                     | 0.809 - 1.619   | 1.088                       | 0.753 - 1.572   | 1.112                            | 0.784 - 1.578   | 1.101                          | 0.728 - 1.666  |
| N                                    | 512                       |                 | 512                         |                 | 512                              |                 | 512                            |                |

\*  $p<0.05$ ; \*\*  $p<0.01$
