# Supplementary material
Source: HighWire-hosted journal article supplement (https://bmjopen.bmj.com/content/12/11/e065804)

Supplementary figures

Figure S1. Distribution of vaccination intentions across the experimental conditions

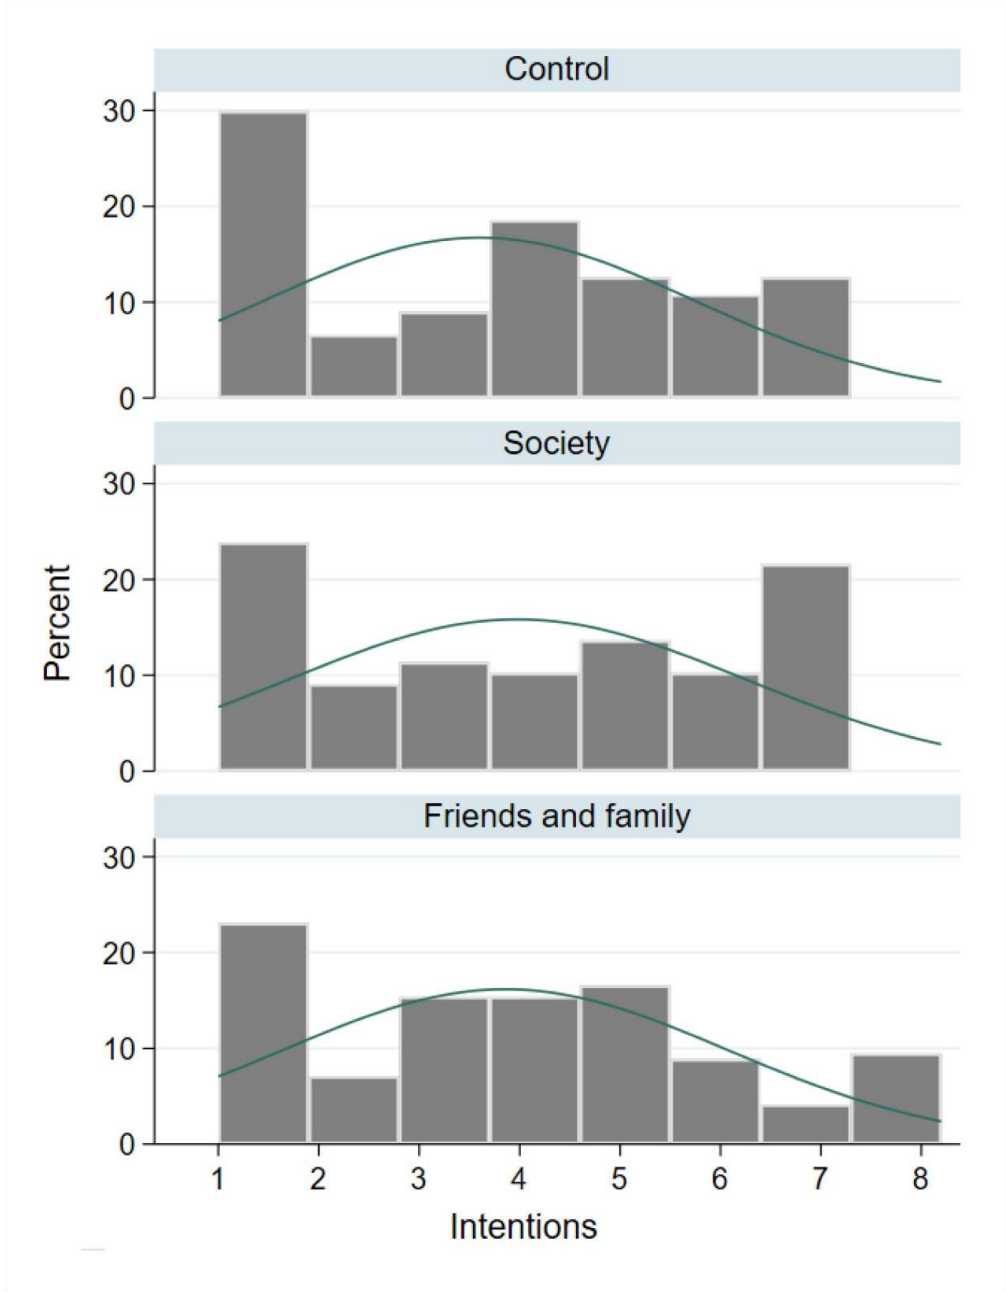

Figure S2. Distribution of perceived social importance of the vaccine across the experimental conditions

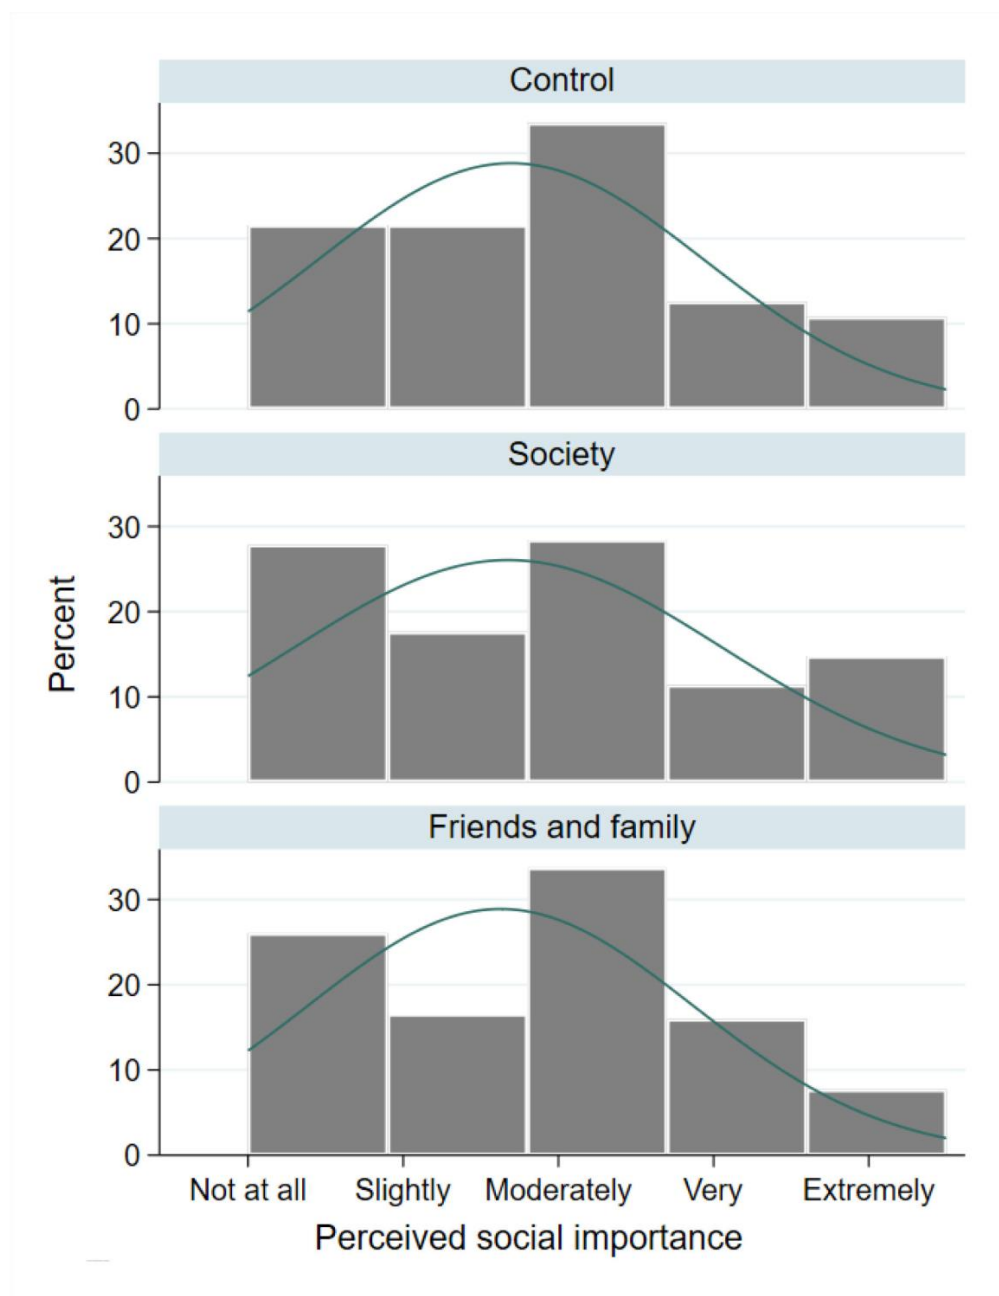

Figure S3. Distribution of the expected vaccination uptake across the experimental conditions

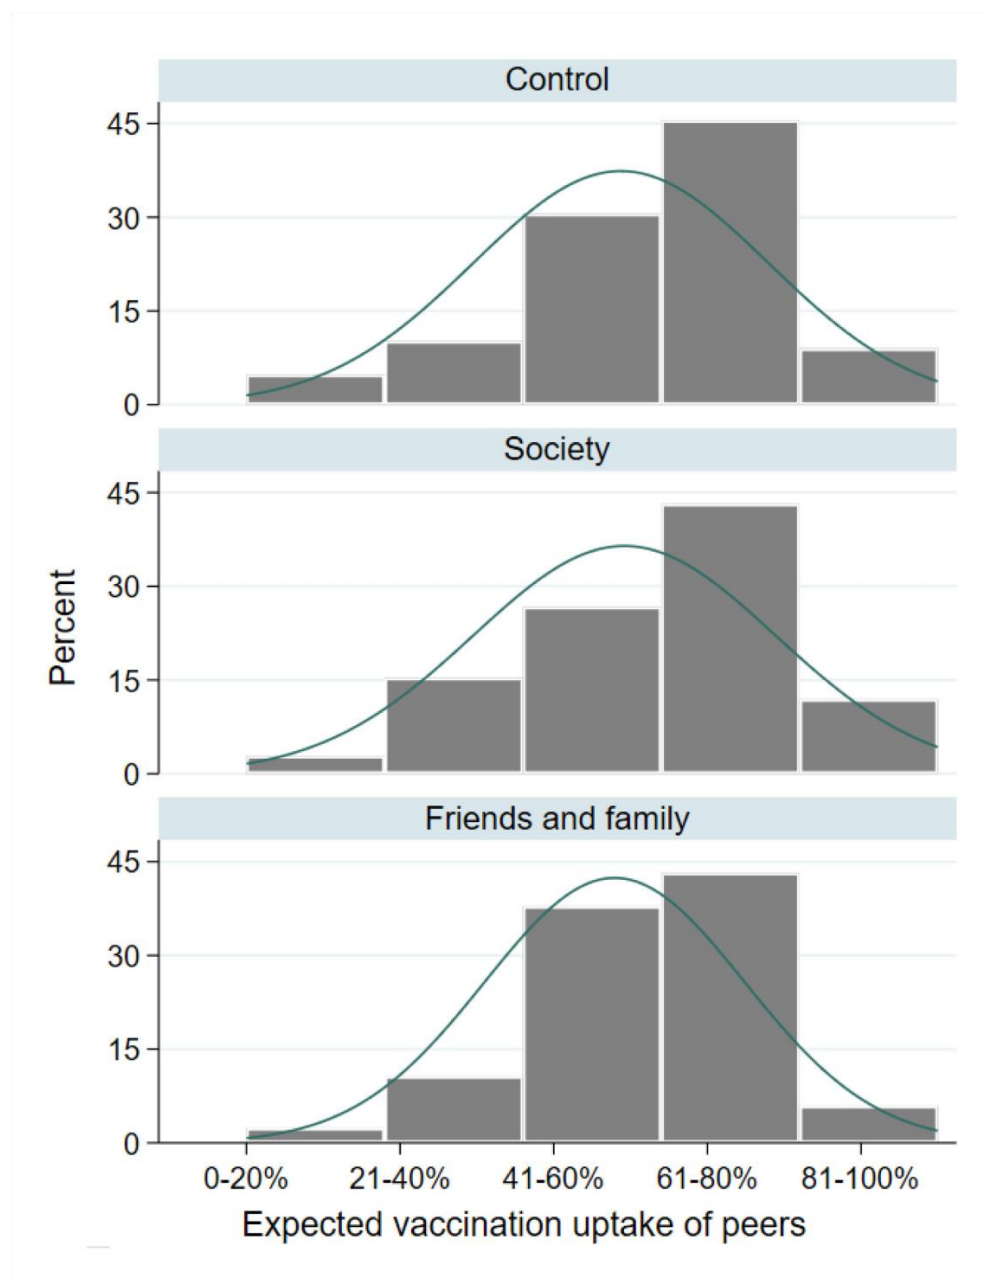

Figure S4. Attitudes towards vaccination

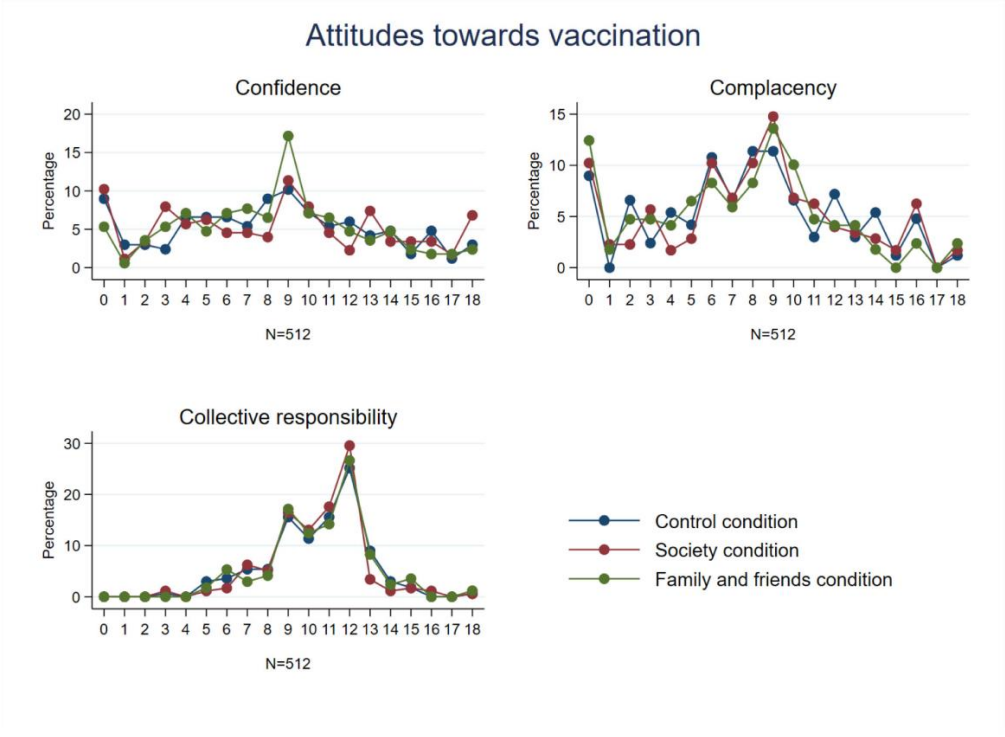

Supplement: inline-supplementary-material-3 [file inline-supplementary-material-3.pdf]
